# Supplementary material for: Pan-cancer EMT-signature identifies RBM47 down-regulation during colorectal cancer progression
Source: PubMed Central journal article supplement (PMC5498532; doi:10.1038/s41598-017-04234-2), 2017-07-05
Supplement: 41598_2017_4234_MOESM1_ESM.pdf [file 41598_2017_4234_MOESM1_ESM.pdf]

## SUPPLEMENTAL MATERIAL

# Pan-cancer EMT-signature identifies RBM47 down-regulation during colorectal cancer progression

Matjaz Rokavec, Markus Kaller, David Horst, and Heiko Hermeking

### Inventory of Supplemental Information

- **Supplemental Figure S1.** Distribution of Vimentin (VIM) and E-cadherin (CDH1) expression in CCLE colorectal cancer cell lines and TCGA colon cancer primary tumors.
- **Supplemental Figure S2.** Venn diagrams showing overlaps between identified CCLE and TCGA epithelial or mesenchymal state-associated mRNAs.
- **Supplemental Figure S3.** Association of *RBM47* expression with overall and relapse free survival in the TCGA pan-cancer dataset
- **Supplemental Table S1.** Comparison of the shared TCGA/CCLE epithelial state-associated mRNA signature with published epithelial-signatures.
- **Supplemental Table S2.** Association of RBM47 expression with clinical and pathological variables
- **Supplemental Table S3.** RBM47 protein expression in tumors and adjacent normal mucosa
- **Supplemental Table S4.** Oligonucleotides used for qPCR
- **Supplemental Table S5.** Oligonucleotides used for qChIP
- **Supplemental Table S6.** List of antibodies

**a**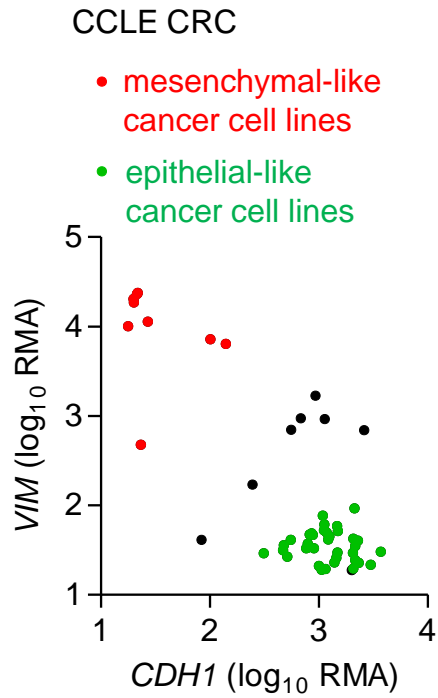**b**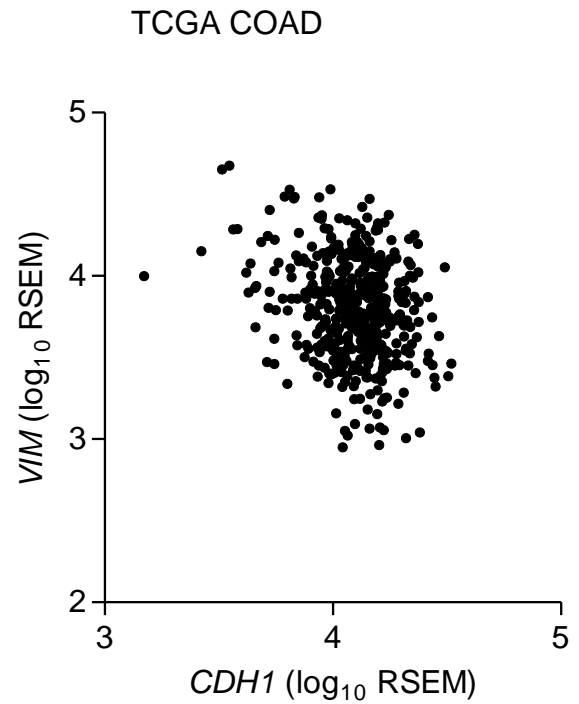

**Supplemental Figure S1.** Distribution of Vimentin (*VIM*) and E-cadherin (*CDH1*) mRNA expression in CCLE colorectal cancer cell lines (a) and TCGA colon cancer primary tumors (b).

shared CCLE/TCGA epithelial state-associated mRNAs

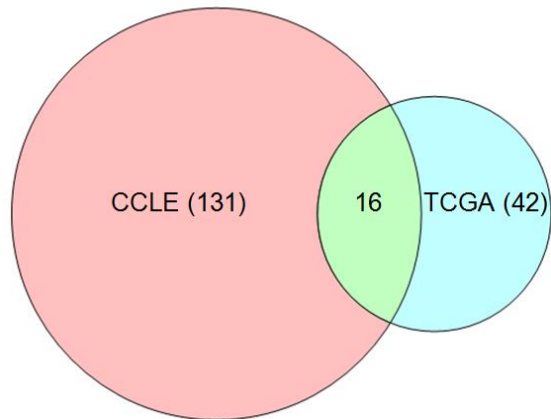

shared CCLE/TCGA mesenchymal state-associated mRNAs

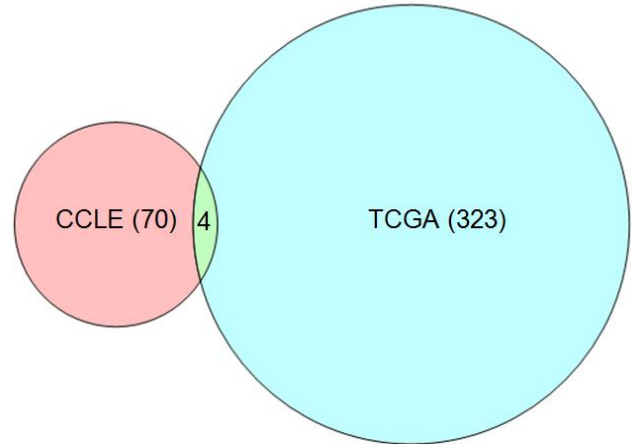

**Supplemental Figure S2.** Venn diagrams showing overlaps between identified CCLE and TCGA epithelial or mesenchymal state-associated mRNAs.

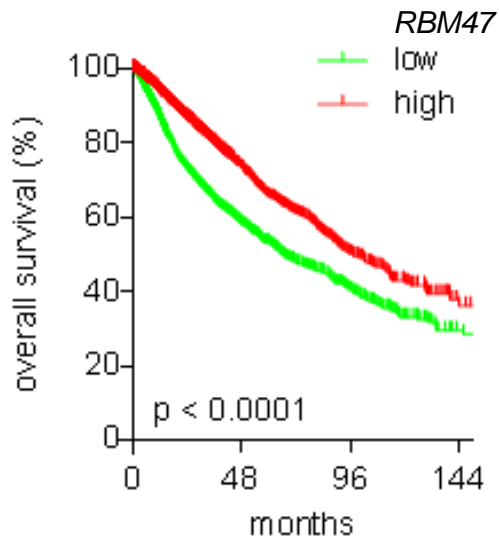

|       |      |     |     |    |
|-------|------|-----|-----|----|
| high: | 3896 | 822 | 158 | 23 |
| low:  | 3766 | 629 | 160 | 32 |

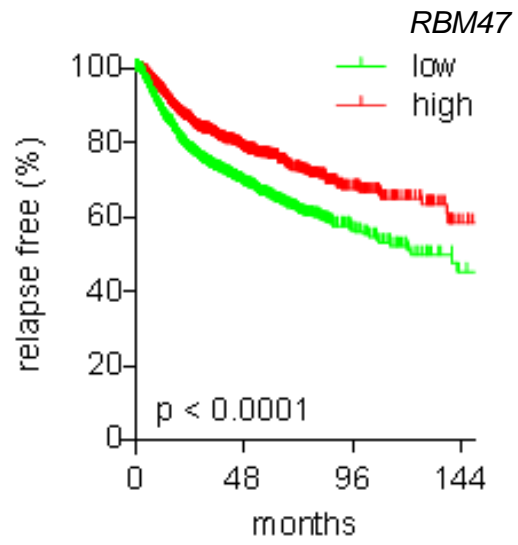

|       |      |     |     |    |
|-------|------|-----|-----|----|
| high: | 2577 | 439 | 104 | 14 |
| low:  | 2502 | 367 | 104 | 18 |

**Supplemental Figure S3.** Association of *RBM47* expression with overall and relapse free survival in the TCGA pan-cancer dataset.

**Supplemental Table S1.** Comparison of the shared TCGA/CCLE EMT-associated mRNA signature with published EMT-signatures.

| mRNA                               | Tan, 2014 | Taube, 2010 | Groger, 2012 | Mak, 2016 |
|------------------------------------|-----------|-------------|--------------|-----------|
| epithelial state-associated mRNAs  |           |             |              |           |
| <i>AFTPH</i>                       |           |             |              |           |
| <i>CDH1</i>                        | *         | *           | *            | *         |
| <i>CDS1</i>                        | *         | *           | *            | *         |
| <i>EPCAM</i>                       | *         |             | *            |           |
| <i>ESRP1</i>                       | *         |             |              | *         |
| <i>ESRP2</i>                       | *         |             |              | *         |
| <i>FA2H</i>                        |           |             |              |           |
| <i>HOOK1</i>                       |           | *           |              | *         |
| <i>LNX1</i>                        |           |             |              |           |
| <i>MAP7</i>                        | *         |             | *            | *         |
| <i>MAPK13</i>                      | *         |             |              |           |
| <i>MARVELD2</i>                    |           |             |              | *         |
| <i>MARVELD3</i>                    |           |             |              | *         |
| <i>MYO5B</i>                       |           |             |              | *         |
| <i>MYO5C</i>                       | *         | *           |              |           |
| <i>RBM47</i>                       | *         |             |              |           |
| mesenchymal state-associated mRNAs |           |             |              |           |
| <i>LGALS1</i>                      |           |             |              |           |
| <i>P4HA3</i>                       |           |             |              |           |
| <i>UROD</i>                        |           |             |              |           |
| <i>VIM</i>                         | *         | *           | *            | *         |

\*, mRNA is present in the indicated EMT-associated signature

Tan, T. Z. *et al.* Epithelial-mesenchymal transition spectrum quantification and its efficacy in deciphering survival and drug responses of cancer patients. *EMBO Mol Med* **6**, 1279-1293 (2014).

Taube, J. H. *et al.* Core epithelial-to-mesenchymal transition interactome gene-expression signature is associated with claudin-low and metaplastic breast cancer subtypes. *Proc Natl Acad Sci U S A* **107**, 15449-15454 (2010).

Groger, C. J., Grubinger, M., Waldhor, T., Vierlinger, K. & Mikulits, W. Meta-analysis of gene expression signatures defining the epithelial to mesenchymal transition during cancer progression. *PLoS One* **7**, e51136 (2012).

Mak, M. P. *et al.* A Patient-Derived, Pan-Cancer EMT Signature Identifies Global Molecular Alterations and Immune Target Enrichment Following Epithelial-to-Mesenchymal Transition. *Clin Cancer Res* **22**, 609-620 (2016).

**Supplemental Table S2.** Association of RBM47 expression with clinical and pathological variables in the case control cohort of primary CRCs with and without liver metastasis

| Characteristics    | Total | RBM47             |                    | p-value       |
|--------------------|-------|-------------------|--------------------|---------------|
|                    |       | Low (scores 0, 1) | High (scores 2, 3) |               |
| All patients       | 86    | 55 (64.0)         | 31 (36.0)          |               |
| Age (y, Median 68) |       |                   |                    |               |
| < 68               | 45    | 29 (64.4)         | 16 (35.6)          | 0.92          |
| ≥ 68               | 41    | 26 (63.4)         | 15 (36.6)          |               |
| Sex                |       |                   |                    |               |
| Male               | 41    | 27 (65.9)         | 14 (34.1)          | 0.73          |
| Female             | 45    | 28 (62.2)         | 17 (37.8)          |               |
| Tumor size (UICC)  |       |                   |                    |               |
| T2                 | 8     | 4 (50.0)          | 4 (50.0)           | 0.68          |
| T3                 | 63    | 41 (65.1)         | 22 (34.9)          |               |
| T4                 | 15    | 10 (66.7)         | 5 (33.3)           |               |
| Nodal status       |       |                   |                    |               |
| N0                 | 38    | 19 (50.0)         | 19 (50.0)          | <b>0.016</b>  |
| N+                 | 48    | 36 (75.0)         | 12 (25.0)          |               |
| Metastasis (Liver) |       |                   |                    |               |
| M0                 | 43    | 21 (48.8)         | 22 (51.2)          | <b>0.0035</b> |
| M1                 | 43    | 34 (79.1)         | 9 (20.9)           |               |
| Tumor grade (WHO)  |       |                   |                    |               |
| Low                | 28    | 17 (60.7)         | 11 (39.3)          | 0.66          |
| High               | 58    | 38 (65.5)         | 29 (34.5)          |               |

Percent values are given in parentheses

**Supplemental Table S3.** RBM47 protein expression in tumors and adjacent normal mucosa.

| RBM47 protein expression |                       |                       |                       |
|--------------------------|-----------------------|-----------------------|-----------------------|
| Criteria                 | Normal mucosa > Tumor | Normal Mucosa = Tumor | Normal Mucosa < Tumor |
| Patient samples*         | 16                    | 9                     | 6                     |

\* Number of patients following the indicated criteria of RMB47 expression in tumors and adjacent normal mucosa

**Supplemental Table S4. Oligonucleotides used for qPCR**

| <b>gene</b>  | <b>forward (5' – 3')</b> | <b>reverse (5' – 3')</b> |
|--------------|--------------------------|--------------------------|
| <i>GAPDH</i> | TGTTGCCATCAATGACCCCTT    | CTCCACGACGTA CTACTCAGCG  |
| <i>RBM47</i> | ATCAGCAATCCTTGGCTCAC     | CCTTGGGATTCTCTGTTCA      |
| <i>CDH1</i>  | CCCGGGACAACGTTTATTAC     | GCTGGCTCAAGTCAAAGTCC     |
| <i>OCLN</i>  | TTTGTGGGACAAGGAACACA     | TATGCCATGGGACTGTCAAC     |
| <i>CLDN1</i> | GGCAGATCCAGTGCAAAGTC     | GGTGGCCACAAAGATTGCTA     |
| <i>CLDN3</i> | GGGACTTCTACAACCCCGTG     | CCGTGTACTTCTTCTCGCGT     |
| <i>ZO-1</i>  | CAGGAAATCTATTTCAAGGTCTGC | CATCACCAAAGGACTCAGCA     |
| <i>SNAIL</i> | GCACATCCGAAGCCACAC       | GGAGAAGGTCCGAGCACAC      |

**Supplemental Table S5. Oligonucleotides used for qChIP**

| <b>gene</b>                  | <b>forward (5' – 3')</b> | <b>reverse (5' – 3')</b> |
|------------------------------|--------------------------|--------------------------|
| <i>STAT3</i><br><i>BDS1</i>  | GGTCCCTCCCTCTCTCCT       | CGAGAGACAACCTTGCTACTG    |
| <i>STAT3</i><br><i>BDS2</i>  | GGCAACTTCCCGTAAATCTG     | AATGTGGCACTGGCCTTTAG     |
| <i>SNAIL</i><br><i>BDS-1</i> | GCCCCAAAAGTCACATGC       | CGTCTGACTCGGACAGATGC     |
| <i>AchR</i>                  | CCTTCATTGGGATCACCACG     | AGGAGATGAGTACCAGCAGGTTG  |



## Supplemental Table S6. List of antibodies

### Primary antibodies

| epitope           | catalog no. | company        | use        | dilution | source |
|-------------------|-------------|----------------|------------|----------|--------|
| RBM47             | # ab167164  | Abcam          | WB         | 1:3000   | rabbit |
| E-cadherin        | #334000     | Invitrogen     | WB         | 1:1000   | mouse  |
| $\alpha$ -tubulin | #T-9026     | Sigma          | WB         | 1:1000   | mouse  |
| SLUG              | #sc-15391   | Santa Cruz     | WB         | 1:1000   | rabbit |
| SNAIL             | #3879S      | Cell Signaling | WB         | 1:1000   | rabbit |
| SNAIL             | #AF3639     | R&D Systems    | ChIP       |          | goat   |
| STAT3             | #sc-482     | Santa Cruz     | WB<br>ChIP | 1:1000   | rabbit |
| p-STAT3 Tyr705    | #9145 XP    | Cell Signaling | WB         | 1:1000   | rabbit |
| Rabbit IgG        | #R-5506     | Sigma          | ChIP       |          | rabbit |
| Goat IgG          | #AB-108-C   | R&D Systems    | ChIP       |          | goat   |

### Secondary antibodies or conjugates

| name            | catalog no. | company | use | dilution | source |
|-----------------|-------------|---------|-----|----------|--------|
| anti-mouse HRP  | # W4021     | Promega | WB  | 1:10.000 | goat   |
| anti-rabbit HRP | # A0545     | Sigma   | WB  | 1:10.000 | goat   |
